# Supplementary material for: Deep Learning for Fully Automated Radiographic Measurements of the Pelvis and Hip
Source: MDPI journal article supplement (doi:10.3390/diagnostics13030497), 2023-01-29
Supplement: s1 [file s1]

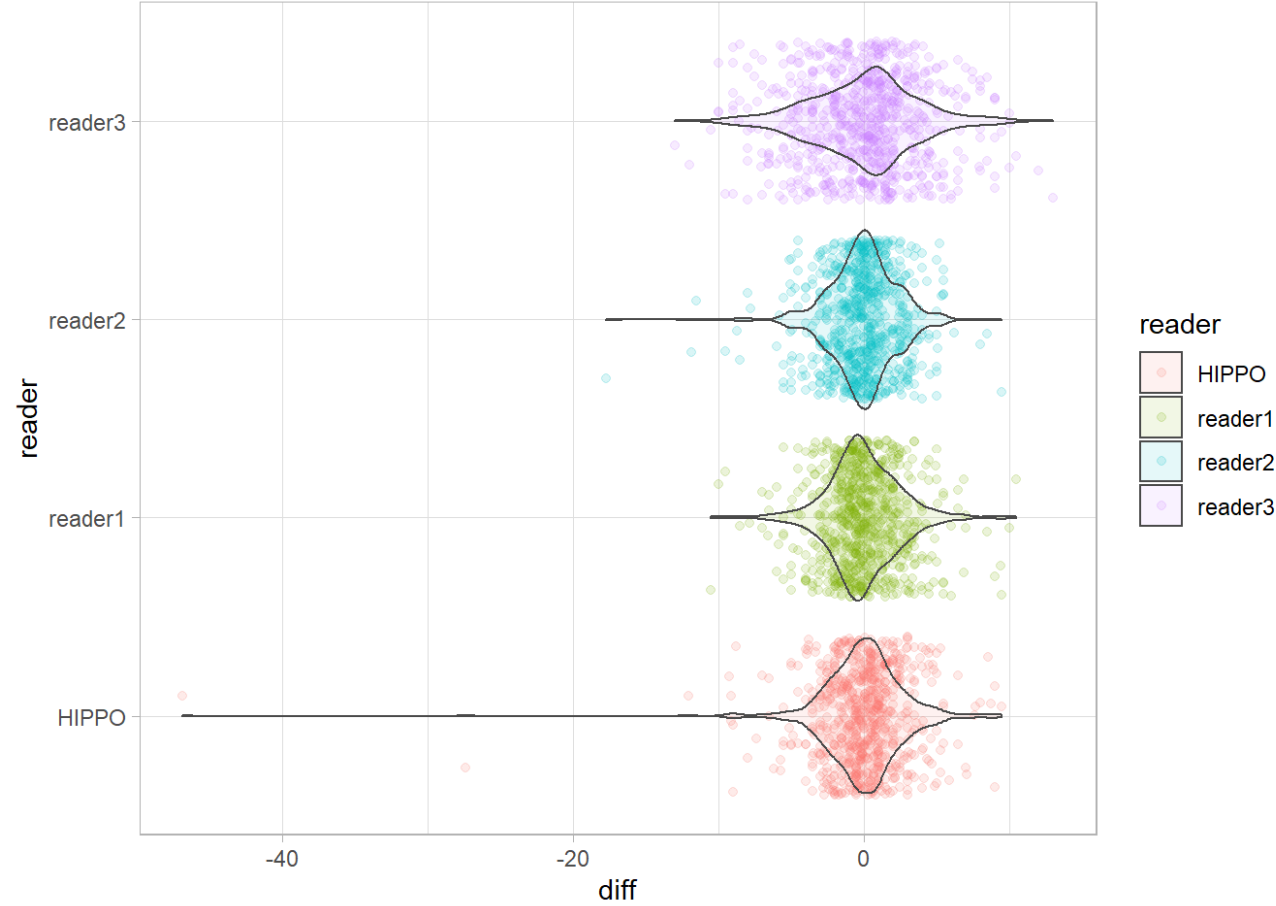

Figure S1: Deviation from the median for each individual observation for all readers and HIPPO™ including outliers

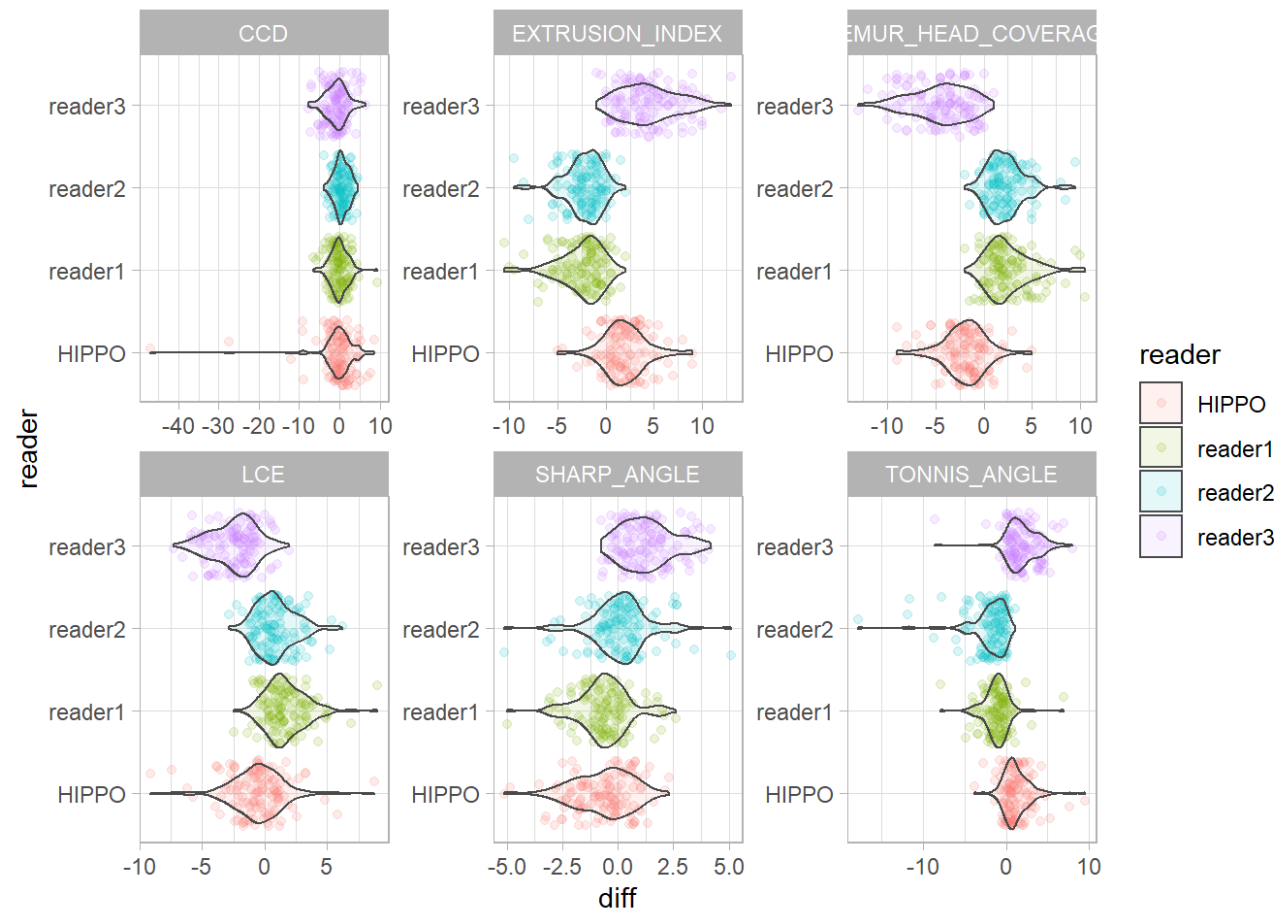

Figure S2: Deviations from the median for each individual observation for all measurements for reader 1-3 and HIPPO™ including outliers

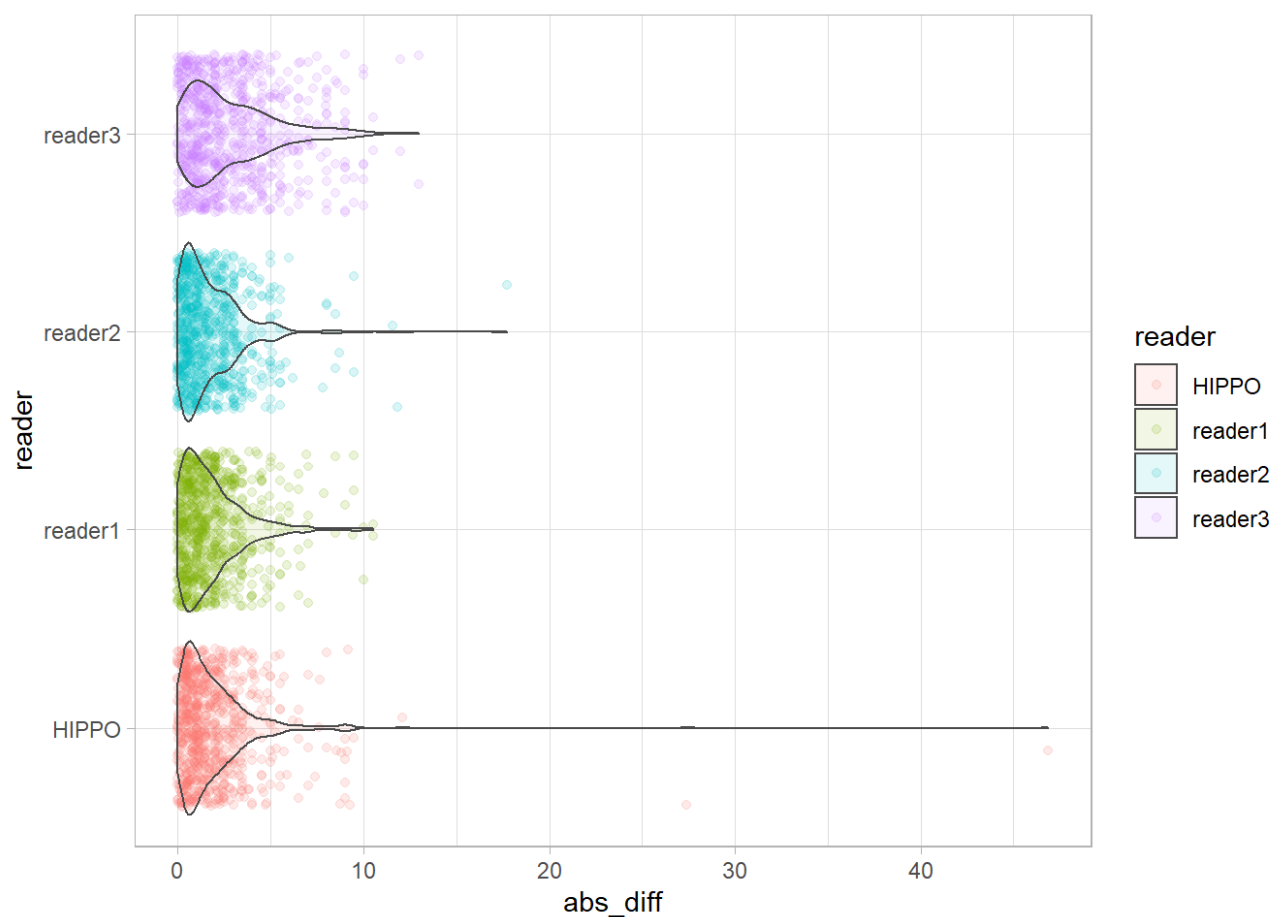

Figure S3: Absolute deviation from the median for each individual observation for all readers and HIPPO™ including outliers

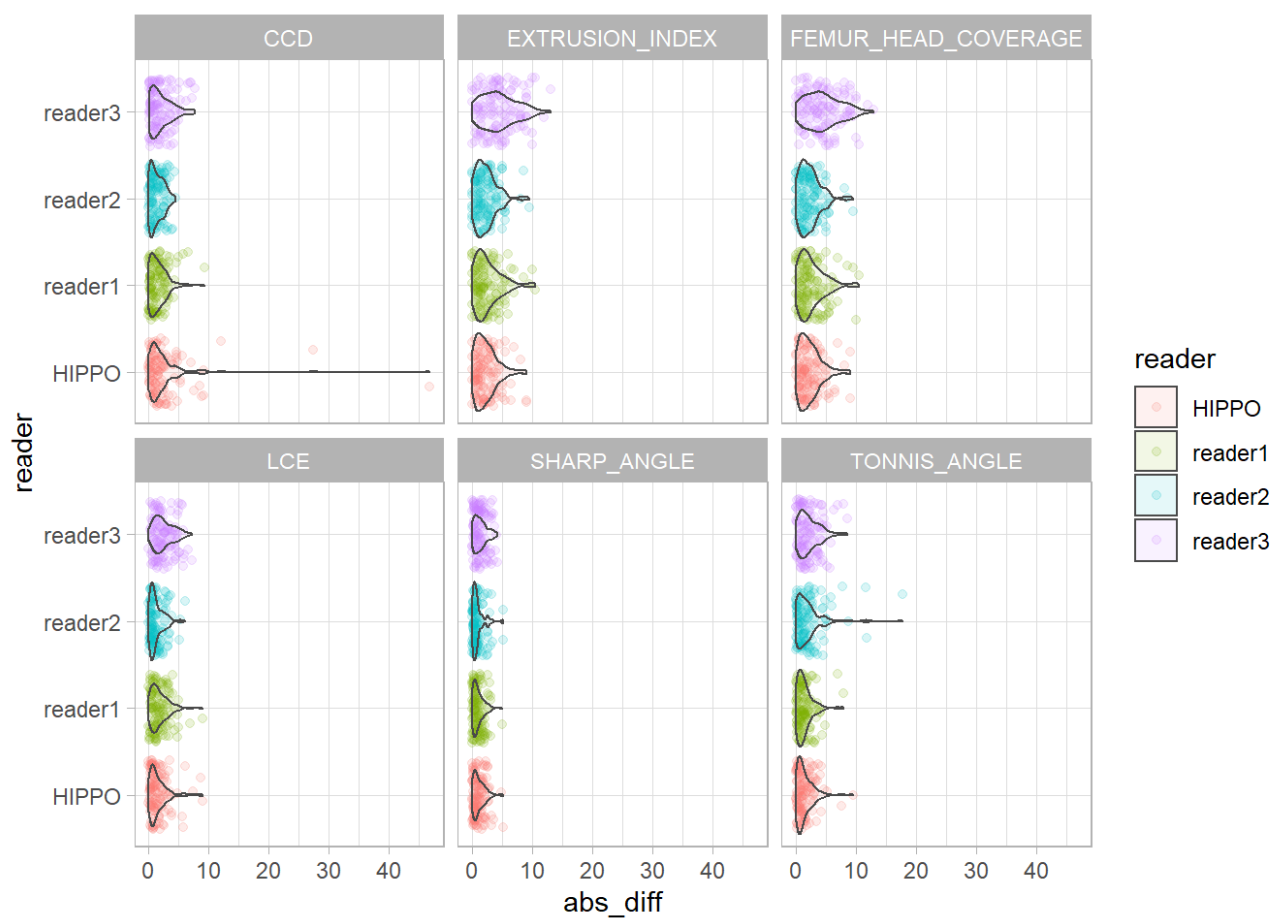

Figure S4: Absolute deviation from the median for all measurements for all readers and HIPPO™ including outliers

| CCD |         |      |        |             | EXTRUSION_INDEX |         |      |        |             | FEMUR_HEAD_COVERAGE |         |      |        |             | LCE |         |      |        |             | SHARP_ANGLE |         |      |        |             | TONNIS_ANGLE |         |      |        |             |
|-----|---------|------|--------|-------------|-----------------|---------|------|--------|-------------|---------------------|---------|------|--------|-------------|-----|---------|------|--------|-------------|-------------|---------|------|--------|-------------|--------------|---------|------|--------|-------------|
|     | reader  | rank | perc   | perc_better |                 | reader  | rank | perc   | perc_better |                     | reader  | rank | perc   | perc_better |     | reader  | rank | perc   | perc_better |             | reader  | rank | perc   | perc_better |              | reader  | rank | perc   | perc_better |
| 1   | HIPPO   | 1    | 0      | 0           | 1               | HIPPO   | 1    | 39.9   | 39.9        | 1                   | HIPPO   | 1    | 40.675 | 40.675      | 1   | HIPPO   | 1    | 8.025  | 8.025       | 1           | HIPPO   | 1    | 10.075 | 10.075      | 1            | HIPPO   | 1    | 42.875 | 42.875      |
| 2   | HIPPO   | 2    | 0.9    | 0.9         | 2               | HIPPO   | 2    | 47.875 | 87.775      | 2                   | HIPPO   | 2    | 46.45  | 87.125      | 2   | HIPPO   | 2    | 71.425 | 79.45       | 2           | HIPPO   | 2    | 24.725 | 34.8        | 2            | HIPPO   | 2    | 56.5   | 99.375      |
| 3   | HIPPO   | 3    | 41.575 | 42.475      | 3               | HIPPO   | 3    | 12.225 | 100         | 3                   | HIPPO   | 3    | 12.875 | 100         | 3   | HIPPO   | 3    | 20.55  | 100         | 3           | HIPPO   | 3    | 52.85  | 87.65       | 3            | HIPPO   | 3    | 0.625  | 100         |
| 4   | HIPPO   | 4    | 57.525 | 100         | 4               | HIPPO   | 4    | 0      | 100         | 4                   | HIPPO   | 4    | 0      | 100         | 4   | HIPPO   | 4    | 0      | 100         | 4           | HIPPO   | 4    | 12.35  | 100         | 4            | HIPPO   | 4    | 0      | 100         |
| 5   | reader1 | 1    | 18.7   | 18.7        | 5               | reader1 | 1    | 4.4    | 4.4         | 5                   | reader1 | 1    | 3.5    | 3.5         | 5   | reader1 | 1    | 0.875  | 0.875       | 5           | reader1 | 1    | 28.2   | 28.2        | 5            | reader1 | 1    | 57.1   | 57.1        |
| 6   | reader1 | 2    | 79.05  | 97.75       | 6               | reader1 | 2    | 15.95  | 20.35       | 6                   | reader1 | 2    | 16.775 | 20.275      | 6   | reader1 | 2    | 19.95  | 20.825      | 6           | reader1 | 2    | 45     | 73.2        | 6            | reader1 | 2    | 42.775 | 99.875      |
| 7   | reader1 | 3    | 2.15   | 99.9        | 7               | reader1 | 3    | 79.65  | 100         | 7                   | reader1 | 3    | 79.725 | 100         | 7   | reader1 | 3    | 79.1   | 99.925      | 7           | reader1 | 3    | 23.625 | 96.825      | 7            | reader1 | 3    | 0.125  | 100         |
| 8   | reader1 | 4    | 0.1    | 100         | 8               | reader1 | 4    | 0      | 100         | 8                   | reader1 | 4    | 0      | 100         | 8   | reader1 | 4    | 0.075  | 100         | 8           | reader1 | 4    | 3.175  | 100         | 8            | reader1 | 4    | 0      | 100         |
| 9   | reader2 | 1    | 81.275 | 81.275      | 9               | reader2 | 1    | 55.7   | 55.7        | 9                   | reader2 | 1    | 55.825 | 55.825      | 9   | reader2 | 1    | 91.1   | 91.1        | 9           | reader2 | 1    | 61.15  | 61.15       | 9            | reader2 | 1    | 0.025  | 0.025       |
| 10  | reader2 | 2    | 18.55  | 99.825      | 10              | reader2 | 2    | 36.175 | 91.875      | 10                  | reader2 | 2    | 36.775 | 92.6        | 10  | reader2 | 2    | 8.625  | 99.725      | 10          | reader2 | 2    | 27.975 | 89.125      | 10           | reader2 | 2    | 0.475  | 0.5         |
| 11  | reader2 | 3    | 0.175  | 100         | 11              | reader2 | 3    | 8.125  | 100         | 11                  | reader2 | 3    | 7.4    | 100         | 11  | reader2 | 3    | 0.275  | 100         | 11          | reader2 | 3    | 10.025 | 99.15       | 11           | reader2 | 3    | 67.6   | 68.1        |
| 12  | reader2 | 4    | 0      | 100         | 12              | reader2 | 4    | 0      | 100         | 12                  | reader2 | 4    | 0      | 100         | 12  | reader2 | 4    | 0      | 100         | 12          | reader2 | 4    | 0.85   | 100         | 12           | reader2 | 4    | 31.9   | 100         |
| 13  | reader3 | 1    | 0.025  | 0.025       | 13              | reader3 | 1    | 0      | 0           | 13                  | reader3 | 1    | 0      | 0           | 13  | reader3 | 1    | 0      | 0           | 13          | reader3 | 1    | 0.575  | 0.575       | 13           | reader3 | 1    | 0      | 0           |
| 14  | reader3 | 2    | 1.5    | 1.525       | 14              | reader3 | 2    | 0      | 0           | 14                  | reader3 | 2    | 0      | 0           | 14  | reader3 | 2    | 0      | 0           | 14          | reader3 | 2    | 2.3    | 2.875       | 14           | reader3 | 2    | 0.25   | 0.25        |
| 15  | reader3 | 3    | 56.1   | 57.625      | 15              | reader3 | 3    | 0      | 0           | 15                  | reader3 | 3    | 0      | 0           | 15  | reader3 | 3    | 0.075  | 0.075       | 15          | reader3 | 3    | 13.5   | 16.375      | 15           | reader3 | 3    | 31.65  | 31.9        |
| 16  | reader3 | 4    | 42.375 | 100         | 16              | reader3 | 4    | 100    | 100         | 16                  | reader3 | 4    | 100    | 100         | 16  | reader3 | 4    | 99.925 | 100         | 16          | reader3 | 4    | 83.625 | 100         | 16           | reader3 | 4    | 68.1   | 100         |

Figure S5: Data for all measurements and readers for SUCRA plots, “perc\_better” indicates the probability for the reader to rank this place or better
